# Supplementary material for: In situ neutron powder diffraction and structure determination in controlled humidities
Source: Royal Society of Chemistry journal article supplement (doi:10.1039/b918702b), 2009-01-01
Supplement: b918702b.pdf [file b918702b.pdf]

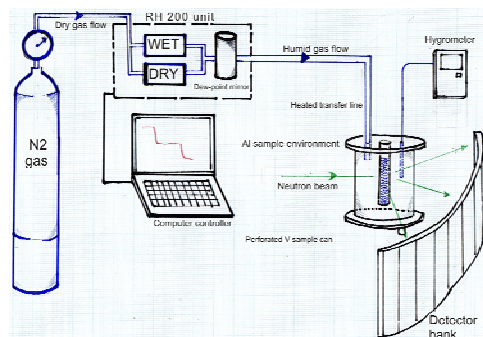

Scheme S1.

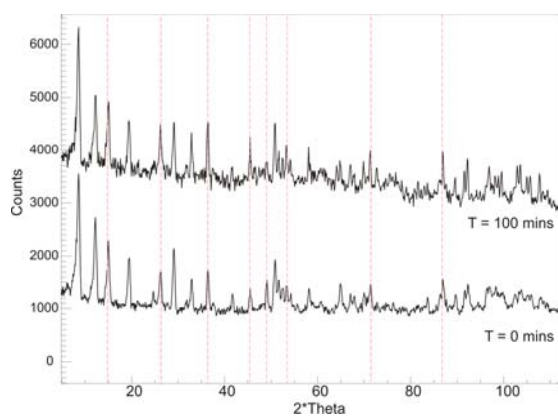

Fig. S1

**Supplementary Table 1:**

Fractional atomic coordinates and  $U_{\text{iso}}$  values for the atoms in the anhydrous  $\text{CuSO}_4$  structure, as obtained from free refinement against a compiled 30 min NPD data set at  $\lambda \sim 1.87 \text{ \AA}$  ( $Pnma$ ,  $a = 8.3976(1) \text{ \AA}$ ,  $b = 6.70382(9) \text{ \AA}$ ,  $c = 4.82443(8) \text{ \AA}$ ,  $\chi^2 = 6.01 \%$ ,  $\text{RF}^2 = 2.39 \%$ ).

| Atom | x           | y           | z         | $U_{\text{iso}}$ |
|------|-------------|-------------|-----------|------------------|
| Cu1  | 0           | 0           | 0         | 0.0048(3)        |
| S1   | 0.1834(4)   | 0.25        | 0.4460(8) | 0.0016(8)        |
| O1   | 0.1289(3)   | 0.25        | 0.7366(4) | 0.0067(4)        |
| O2   | 0.3643(2)   | 0.25        | 0.4383(3) | 0.0061(4)        |
| O3   | 0.13256(19) | 0.06752(15) | 0.3091(2) | 0.0066(3)        |

**Supplementary Table 2:**

Fractional atomic coordinates and  $U_{\text{iso}}$  values for the atoms in the  $\text{CuSO}_4 \cdot \text{H}_2\text{O}$  structure, as refined against a compiled 30 min NPD data set at  $\lambda \sim 1.87 \text{ \AA}$  ( $P-1$ ,  $a = 5.0401(6) \text{ \AA}$ ,  $b = 5.1566(7) \text{ \AA}$ ,  $c = 7.5691(8) \text{ \AA}$ ,  $\alpha = 108.39(8)^\circ$ ,  $\beta = 108.992(7)^\circ$ ,  $\gamma = 90.4(1)^\circ$ ,  $\chi^2 = 9.4 \%$ ,  $\text{RF}^2 = 3.37 \%$ ). The refinement was carried out with soft constraints on the S-O bond lengths.

| Atom | x          | y          | z          | $U_{\text{iso}}$ |
|------|------------|------------|------------|------------------|
| Cu1  | 0          | 0          | 0          | 0.015(2)         |
| Cu2  | 0.5        | 0.5        | 0.5        | 0.019(3)         |
| S1   | 0.6215(19) | 0.9269(13) | 0.2484(12) | 0.008(4)         |
| O1   | 0.798(2)   | 0.832(2)   | 0.1232(18) | 0.017(2)         |
| O2   | 0.3173(18) | 0.8316(19) | 0.1363(14) | 0.010(2)         |
| O3   | 0.671(2)   | 0.2312(12) | 0.3286(12) | 0.009(2)         |
| O4   | 0.712(2)   | 0.8058(17) | 0.4083(12) | 0.012(2)         |
| O5   | 0.115(2)   | 0.4391(14) | 0.2650(13) | 0.002(2)         |
| H1   | -0.066(6)  | 0.482(4)   | 0.285(4)   | 0.12(1)          |
| H2   | 0.171(3)   | 0.577(3)   | 0.2170(18) | 0.0150(4)        |

**Supplementary Material (ESI) for Chemical Communications**  
**This journal is (c) The Royal Society of Chemistry 2009**

**Supplementary Table 3:**

Fractional atomic coordinates and  $U_{\text{iso}}$  values for the atoms in the  $\text{CuSO}_4 \cdot 3\text{H}_2\text{O}$  structure, as refined against a compiled 30 min NPD data set at  $\lambda \sim 1.87 \text{ \AA}$  ( $C1c1$ ,  $a = 5.5969(8) \text{ \AA}$ ,  $b = 13.0368(2) \text{ \AA}$ ,  $c = 7.3566(9) \text{ \AA}$ ,  $\beta = 97.05(1)^\circ$ ,  $\chi^2 = 9.82 \%$ ,  $\text{RF}^2 = 7.38 \%$ ). The refinement was carried out with soft constraints on the S-O and O-H bond lengths.

| Atom | x        | y          | x        | $U_{\text{iso}}$ |
|------|----------|------------|----------|------------------|
| Cu1  | 0.493(4) | 0.3653(15) | 0.514(3) | 0.032(5)         |
| S1   | 0.276(6) | 0.119(3)   | 0.424(5) | 0.16(3)          |
| O1   | 0.152(5) | 0.165(2)   | 0.250(4) | 0.040(8)         |
| O2   | 0.830(4) | 0.304(2)   | 0.075(3) | 0.018(6)         |
| O3   | 0.487(4) | 0.0609(15) | 0.389(3) | 0.022(6)         |
| O4   | 0.100(4) | 0.9523(16) | 0.989(3) | 0.008(6)         |
| O5   | 0.351(3) | 0.3647(14) | 0.251(2) | 0.021(7)         |
| O6   | 0.686(3) | 0.0915(16) | 0.084(2) | 0.012(6)         |
| O7   | 0.784(3) | 0.3010(16) | 0.410(2) | 0.004(6)         |
| H1   | 0.419(8) | 0.382(4)   | 0.139(4) | 0.09(2)          |
| H2   | 0.258(7) | 0.302(2)   | 0.219(6) | 0.06(1)          |
| H3   | 0.638(9) | 0.082(3)   | 0.207(3) | 0.06(2)          |
| H4   | 0.614(6) | 0.032(2)   | 0.015(4) | 0.02(1)          |
| H5   | 0.936(5) | 0.324(3)   | 0.479(4) | 0.03(1)          |
| H6   | 0.799(6) | 0.321(3)   | 0.283(2) | 0.04(1)          |

**Supplementary Table 4:**

Fractional atomic coordinates and  $U_{\text{iso}}$  values for the atoms in the  $\text{CuSO}_4 \cdot 5\text{H}_2\text{O}$  structure, as refined against a compiled 30 min NPD data set at  $\lambda \sim 1.87 \text{ \AA}$  ( $P-1$ ,  $a = 6.1141(5) \text{ \AA}$ ,  $b = 10.7127(9) \text{ \AA}$ ,  $c = 5.9587(5) \text{ \AA}$ ,  $\alpha = 82.350(6)^\circ$ ,  $\beta = 107.314(6)^\circ$ ,  $\gamma = 102.589(5)^\circ$ ,  $\chi^2 = 7.68 \%$ ,  $\text{RF}^2 = 9.54 \%$ ). The refinement was carried out with soft constraints on the S-O and O-H bond lengths. In addition,  $U_{\text{iso}}$  values of similar atoms in similar bonding environments were constrained to be the same.

| Atom | x        | y          | z        | $U_{\text{iso}}$ |
|------|----------|------------|----------|------------------|
| Cu1  | 0        | 0          | 0        | 0.014(4)         |
| Cu2  | 0.5      | 0.5        | 0        | 0.014(4)         |
| S1   | 0.022(2) | 0.2930(14) | 0.632(3) | 0.02(1)          |
| O1   | 0.927(3) | 0.1545(15) | 0.664(3) | 0.019(2)         |
| O2   | 0.255(3) | 0.3192(15) | 0.805(3) | 0.019(2)         |
| O3   | 0.846(3) | 0.3699(16) | 0.623(2) | 0.019(2)         |
| O4   | 0.024(3) | 0.3030(15) | 0.383(3) | 0.019(2)         |
| O5   | 0.812(4) | 0.0776(13) | 0.145(2) | 0.024(2)         |
| O6   | 0.302(3) | 0.1114(13) | 0.145(2) | 0.024(2)         |
| O7   | 0.452(2) | 0.4174(17) | 0.294(2) | 0.024(2)         |
| O8   | 0.749(3) | 0.4055(19) | 0.007(3) | 0.024(2)         |
| O9   | 0.436(4) | 0.1207(19) | 0.652(4) | 0.024(2)         |
| H1   | 0.884(4) | 0.1403(16) | 0.263(3) | 0.035(2)         |
| H2   | 0.726(4) | 0.0070(16) | 0.225(4) | 0.035(2)         |
| H3   | 0.321(6) | 0.2012(15) | 0.082(4) | 0.035(2)         |
| H4   | 0.328(5) | 0.117(3)   | 0.314(2) | 0.035(2)         |
| H5   | 0.319(3) | 0.385(3)   | 0.359(4) | 0.035(2)         |
| H6   | 0.588(3) | 0.406(3)   | 0.427(3) | 0.035(2)         |
| H7   | 0.855(6) | 0.389(4)   | 0.924(5) | 0.035(2)         |
| H8   | 0.808(4) | 0.368(3)   | 0.167(3) | 0.035(2)         |
| H9   | 0.597(4) | 0.107(4)   | 0.714(8) | 0.035(2)         |
| H10  | 0.438(6) | 0.199(2)   | 0.722(6) | 0.035(2)         |
